# Supplementary material for: Determination of microcystin-LR in surface water by a magnetic bead-based colorimetric immunoassay using antibody-conjugated gold nanoparticles
Source: Royal Society of Chemistry journal article supplement (doi:10.1039/c5ay02164b), 2015-09-10
Supplement: c5ay02164b1.pdf [file c5ay02164b1.pdf]

## Electronic Supplementary Information

### Determination of Microcystin-LR in surface water by a magnetic bead-based colorimetric immunoassay using antibody-conjugated gold nanoparticles

*A.-C. Neumann, X. Wang, R. Niessner, D. Knopp\**

Chair for Analytical Chemistry, Institute of Hydrochemistry, Technische Universität  
München, Marchioninstr. 17, D-81377 München, Germany.

\* Corresponding author: dietmar.knopp@ch.tum.de

#### Fresh water sample measurement

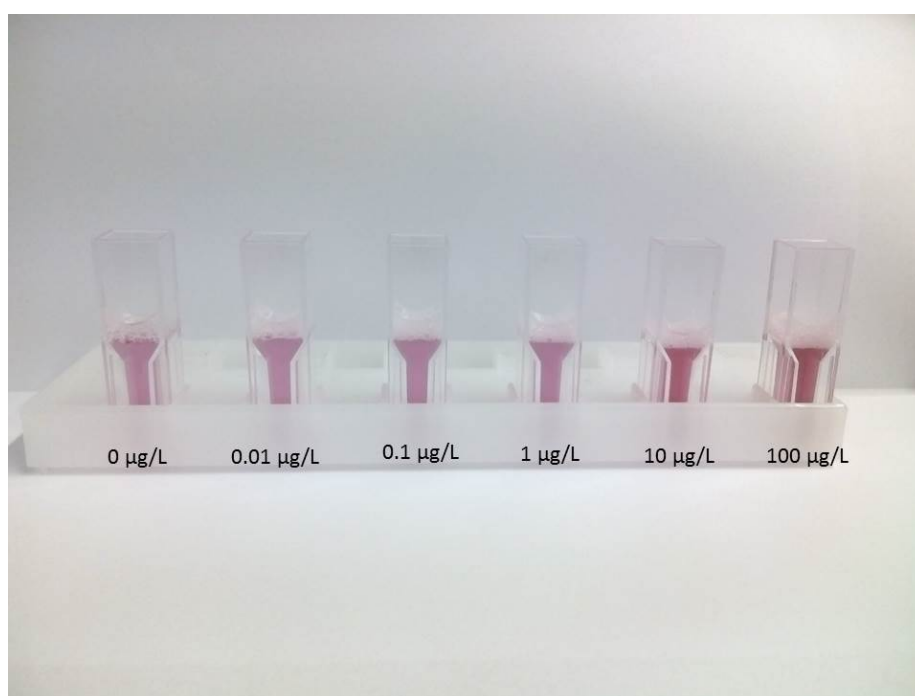

**Fig. S1** Photographic image of MC-LR standards after competition step and gold staining reaction.
